# Supplementary material
Source: MDPI journal article supplement (https://www.mdpi.com/2073-4352/1/4/236)
Supplement: s1 [file s1]

 

data_wh415a 

# racemic
 
_audit_creation_method            SHELXL-97 
_chemical_name_systematic 
; 
 ? 
; 
_chemical_name_common             ? 
_chemical_melting_point           ? 
_chemical_formula_moiety          'C5 H14 N2, H O3 P, 2.230(H2 O)'
_chemical_formula_sum             'C5 H19.47 N2 O5.24 P' 
_chemical_formula_weight          222.49 
 
loop_ 
 _atom_type_symbol 
 _atom_type_description 
 _atom_type_scat_dispersion_real 
 _atom_type_scat_dispersion_imag 
 _atom_type_scat_source 
 'C'  'C'   0.0033   0.0016 
 'International Tables Vol C Tables 4.2.6.8 and 6.1.1.4' 
 'H'  'H'   0.0000   0.0000 
 'International Tables Vol C Tables 4.2.6.8 and 6.1.1.4' 
 'N'  'N'   0.0061   0.0033 
 'International Tables Vol C Tables 4.2.6.8 and 6.1.1.4' 
 'O'  'O'   0.0106   0.0060 
 'International Tables Vol C Tables 4.2.6.8 and 6.1.1.4' 
 'P'  'P'   0.1023   0.0942 
 'International Tables Vol C Tables 4.2.6.8 and 6.1.1.4' 
 
_symmetry_cell_setting            trigonal 
_symmetry_space_group_name_H-M    'R -3' 
_symmetry_space_group_name_Hall   '-R 3' 
 
loop_ 
 _symmetry_equiv_pos_as_xyz 
 'x, y, z' 
 '-y, x-y, z' 
 '-x+y, -x, z' 
 'x+2/3, y+1/3, z+1/3' 
 '-y+2/3, x-y+1/3, z+1/3' 
 '-x+y+2/3, -x+1/3, z+1/3' 
 'x+1/3, y+2/3, z+2/3' 
 '-y+1/3, x-y+2/3, z+2/3' 
 '-x+y+1/3, -x+2/3, z+2/3' 
 '-x, -y, -z' 
 'y, -x+y, -z' 
 'x-y, x, -z' 
 '-x+2/3, -y+1/3, -z+1/3' 
 'y+2/3, -x+y+1/3, -z+1/3' 
 'x-y+2/3, x+1/3, -z+1/3' 
 '-x+1/3, -y+2/3, -z+2/3' 
 'y+1/3, -x+y+2/3, -z+2/3' 
 'x-y+1/3, x+2/3, -z+2/3' 
 
_cell_length_a                    31.075(2) 
_cell_length_b                    31.075(2) 
_cell_length_c                    6.1875(4) 
_cell_angle_alpha                 90.00 
_cell_angle_beta                  90.00 
_cell_angle_gamma                 120.00 
_cell_volume                      5174.5(6) 
_cell_formula_units_Z             18 
_cell_measurement_temperature     293(2) 
_cell_measurement_reflns_used     2123 
_cell_measurement_theta_min       2.27 
_cell_measurement_theta_max       22.42 
 
_exptl_crystal_description        needle 
_exptl_crystal_colour             colourless 
_exptl_crystal_size_max           0.45 
_exptl_crystal_size_mid           0.04 
_exptl_crystal_size_min           0.03 
_exptl_crystal_density_meas       ? 
_exptl_crystal_density_diffrn     1.285 
_exptl_crystal_density_method     'not measured' 
_exptl_crystal_F_000              2167 
_exptl_absorpt_coefficient_mu     0.240 
_exptl_absorpt_correction_type    none 
_exptl_absorpt_correction_T_min   . 
_exptl_absorpt_correction_T_max   . 
_exptl_absorpt_process_details    ? 
 
_exptl_special_details 
; 
 ? 
; 
 
_diffrn_ambient_temperature       293(2) 
_diffrn_radiation_wavelength      0.71073 
_diffrn_radiation_type            MoK\a 
_diffrn_radiation_source          'fine-focus sealed tube' 
_diffrn_radiation_monochromator   graphite 
_diffrn_measurement_device_type   'Bruker SMART1000 CCD' 
_diffrn_measurement_method        \w
_diffrn_detector_area_resol_mean  ? 
_diffrn_standards_number          ? 
_diffrn_standards_interval_count  ? 
_diffrn_standards_interval_time   ? 
_diffrn_standards_decay_%         0 
_diffrn_reflns_number             11694 
_diffrn_reflns_av_R_equivalents   0.0673 
_diffrn_reflns_av_sigmaI/netI     0.0624 
_diffrn_reflns_limit_h_min        -37 
_diffrn_reflns_limit_h_max        38 
_diffrn_reflns_limit_k_min        -38 
_diffrn_reflns_limit_k_max        27 
_diffrn_reflns_limit_l_min        -7 
_diffrn_reflns_limit_l_max        7 
_diffrn_reflns_theta_min          2.27 
_diffrn_reflns_theta_max          26.00 
_reflns_number_total              2270 
_reflns_number_gt                 1419 
_reflns_threshold_expression      I>2\s(I) 
 
_computing_data_collection        'SMART (Bruker, 1999)'
_computing_cell_refinement        'SAINT (Bruker, 1999)'
_computing_data_reduction         'SAINT'
_computing_structure_solution     'SHELXS-97 (Sheldrick, 2008)' 
_computing_structure_refinement   'SHELXL-97 (Sheldrick, 2008)' 
_computing_molecular_graphics     'ORTEP-3 (Farrugia, 1997)'
_computing_publication_material   'SHELXL-97'

_refine_special_details 
; 
 Refinement of F^2^ against ALL reflections.  The weighted R-factor wR and 
 goodness of fit S are based on F^2^, conventional R-factors R are based 
 on F, with F set to zero for negative F^2^. The threshold expression of 
 F^2^ > 2sigma(F^2^) is used only for calculating R-factors(gt) etc. and is 
 not relevant to the choice of reflections for refinement.  R-factors based 
 on F^2^ are statistically about twice as large as those based on F, and R- 
 factors based on ALL data will be even larger. 
; 
 
_refine_ls_structure_factor_coef  Fsqd  
_refine_ls_matrix_type            full 
_refine_ls_weighting_scheme       calc  
_refine_ls_weighting_details 
 'calc w=1/[\s^2^(Fo^2^)+(0.0541P)^2^] where P=(Fo^2^+2Fc^2^)/3' 
_atom_sites_solution_primary      direct 
_atom_sites_solution_secondary    difmap 
_atom_sites_solution_hydrogens    'difmap and geom' 
_refine_ls_hydrogen_treatment     constr 
_refine_ls_extinction_method      none 
_refine_ls_extinction_coef        ? 
_refine_ls_number_reflns          2270 
_refine_ls_number_parameters      120 
_refine_ls_number_restraints      0 
_refine_ls_R_factor_all           0.0835 
_refine_ls_R_factor_gt            0.0444 
_refine_ls_wR_factor_ref          0.1072 
_refine_ls_wR_factor_gt           0.0970 
_refine_ls_goodness_of_fit_ref    0.928 
_refine_ls_restrained_S_all       0.928 
_refine_ls_shift/su_max           0.009 
_refine_ls_shift/su_mean          0.000 
 
loop_ 
 _atom_site_label 
 _atom_site_type_symbol 
 _atom_site_fract_x 
 _atom_site_fract_y 
 _atom_site_fract_z 
 _atom_site_U_iso_or_equiv 
 _atom_site_adp_type 
 _atom_site_occupancy 
 _atom_site_symmetry_multiplicity 
 _atom_site_calc_flag 
 _atom_site_refinement_flags 
 _atom_site_disorder_assembly 
 _atom_site_disorder_group 
C1 C 0.16424(10) 0.13329(10) 1.0671(4) 0.0488(7) Uani 1 1 d . . . 
H1A H 0.1521 0.1460 1.1806 0.059 Uiso 1 1 calc R . . 
H1B H 0.1426 0.0975 1.0599 0.059 Uiso 1 1 calc R . . 
C2 C 0.16336(10) 0.15629(10) 0.8542(4) 0.0472(7) Uani 1 1 d . . . 
H2A H 0.1732 0.1418 0.7393 0.057 Uiso 1 1 calc R . . 
H2B H 0.1299 0.1494 0.8241 0.057 Uiso 1 1 calc R . . 
C3 C 0.24875(9) 0.22250(10) 0.9113(4) 0.0430(7) Uani 1 1 d . . . 
H3A H 0.2700 0.2583 0.9195 0.052 Uiso 1 1 calc R . . 
H3B H 0.2611 0.2104 0.7958 0.052 Uiso 1 1 calc R . . 
C4 C 0.25143(9) 0.19952(9) 1.1228(4) 0.0388(6) Uani 1 1 d . . . 
H4 H 0.2419 0.2143 1.2400 0.047 Uiso 1 1 calc R . . 
C5 C 0.30388(11) 0.20969(12) 1.1653(5) 0.0648(9) Uani 1 1 d . . . 
H5A H 0.3047 0.1948 1.3000 0.097 Uiso 1 1 calc R . . 
H5B H 0.3262 0.2449 1.1722 0.097 Uiso 1 1 calc R . . 
H5C H 0.3139 0.1958 1.0505 0.097 Uiso 1 1 calc R . . 
N1 N 0.19754(7) 0.21057(8) 0.8604(3) 0.0394(5) Uani 1 1 d . . . 
H1C H 0.1972 0.2238 0.7314 0.047 Uiso 1 1 calc R . . 
H1D H 0.1871 0.2242 0.9609 0.047 Uiso 1 1 calc R . . 
N2 N 0.21563(8) 0.14508(7) 1.1178(3) 0.0404(5) Uani 1 1 d . . . 
H2C H 0.2256 0.1309 1.0179 0.048 Uiso 1 1 calc R . . 
H2D H 0.2158 0.1319 1.2472 0.048 Uiso 1 1 calc R . . 
P1 P 0.15266(2) 0.24525(3) 0.38144(10) 0.0360(2) Uani 1 1 d . . . 
H1 H 0.1582 0.2896 0.4167 0.043 Uiso 1 1 calc R . . 
O1 O 0.14844(6) 0.23776(7) 0.1386(2) 0.0463(5) Uani 1 1 d . . . 
O2 O 0.10577(6) 0.20855(7) 0.4993(3) 0.0542(5) Uani 1 1 d . . . 
O3 O 0.19835(6) 0.24666(7) 0.4717(3) 0.0503(5) Uani 1 1 d . . . 
O4 O 0.29532(8) 0.31123(7) 0.3594(3) 0.0701(6) Uani 1 1 d . . . 
H41 H 0.2634 0.2900 0.4100 0.084 Uiso 1 1 d R . . 
H42 H 0.3127 0.3114 0.4799 0.084 Uiso 1 1 d R . . 
O5 O 0.05851(10) 0.10381(10) 0.4680(6) 0.1335(13) Uani 1 1 d . . . 
H51 H 0.0813 0.1396 0.4829 0.160 Uiso 1 1 d R . . 
H52 H 0.0280 0.0981 0.4446 0.160 Uiso 1 1 d R . . 
O6 O 0.06189(10) 0.02022(10) -0.0346(6) 0.239(15) Uiso 0.230(11) 1 d PR . . 
H61 H 0.0748 0.0280 -0.1687 0.287 Uiso 0.230(11) 1 d PR . . 
H62 H 0.0368 0.0268 -0.0347 0.287 Uiso 0.230(11) 1 d PR . . 
 
loop_ 
 _atom_site_aniso_label 
 _atom_site_aniso_U_11 
 _atom_site_aniso_U_22 
 _atom_site_aniso_U_33 
 _atom_site_aniso_U_23 
 _atom_site_aniso_U_13 
 _atom_site_aniso_U_12 
C1 0.0511(17) 0.0393(15) 0.0521(17) 0.0057(13) 0.0044(13) 0.0197(14) 
C2 0.0500(17) 0.0513(17) 0.0468(16) -0.0061(13) -0.0081(13) 0.0302(15) 
C3 0.0426(16) 0.0460(16) 0.0437(16) 0.0105(12) 0.0070(12) 0.0246(13) 
C4 0.0447(15) 0.0426(15) 0.0353(14) -0.0008(11) -0.0013(11) 0.0265(13) 
C5 0.057(2) 0.075(2) 0.069(2) 0.0084(17) -0.0036(16) 0.0375(18) 
N1 0.0518(14) 0.0491(13) 0.0281(11) 0.0067(9) 0.0036(9) 0.0333(12) 
N2 0.0603(15) 0.0439(13) 0.0296(11) 0.0063(9) 0.0063(10) 0.0354(12) 
P1 0.0401(4) 0.0459(4) 0.0270(3) -0.0027(3) -0.0019(3) 0.0253(3) 
O1 0.0478(11) 0.0748(13) 0.0271(9) -0.0018(9) -0.0016(8) 0.0387(10) 
O2 0.0418(11) 0.0716(13) 0.0395(11) -0.0077(9) 0.0066(8) 0.0210(10) 
O3 0.0445(11) 0.0735(13) 0.0342(10) 0.0096(9) -0.0029(8) 0.0305(10) 
O4 0.0603(14) 0.0619(14) 0.0661(15) 0.0080(11) 0.0009(10) 0.0140(11) 
O5 0.0748(18) 0.0726(19) 0.257(4) -0.006(2) -0.012(2) 0.0395(15) 
 
_geom_special_details 
; 
 All esds (except the esd in the dihedral angle between two l.s. planes) 
 are estimated using the full covariance matrix.  The cell esds are taken 
 into account individually in the estimation of esds in distances, angles 
 and torsion angles; correlations between esds in cell parameters are only 
 used when they are defined by crystal symmetry.  An approximate (isotropic) 
 treatment of cell esds is used for estimating esds involving l.s. planes. 
; 
 
loop_ 
 _geom_bond_atom_site_label_1 
 _geom_bond_atom_site_label_2 
 _geom_bond_distance 
 _geom_bond_site_symmetry_2 
 _geom_bond_publ_flag 
C1 N2 1.483(3) . ? 
C1 C2 1.506(3) . ? 
C1 H1A 0.9700 . ? 
C1 H1B 0.9700 . ? 
C2 N1 1.478(3) . ? 
C2 H2A 0.9700 . ? 
C2 H2B 0.9700 . ? 
C3 N1 1.476(3) . ? 
C3 C4 1.513(3) . ? 
C3 H3A 0.9700 . ? 
C3 H3B 0.9700 . ? 
C4 N2 1.489(3) . ? 
C4 C5 1.520(4) . ? 
C4 H4 0.9800 . ? 
C5 H5A 0.9600 . ? 
C5 H5B 0.9600 . ? 
C5 H5C 0.9600 . ? 
N1 H1C 0.9000 . ? 
N1 H1D 0.9000 . ? 
N2 H2C 0.9000 . ? 
N2 H2D 0.9000 . ? 
P1 O3 1.5059(18) . y 
P1 O2 1.5144(18) . y 
P1 O1 1.5161(16) . y 
P1 H1 1.3200 . ? 
O4 H41 0.9283 . ? 
O4 H42 0.9188 . ? 
O5 H51 0.9781 . ? 
O5 H52 0.8854 . ? 
O6 O6 1.752(3) 11 ? 
O6 O6 1.752(3) 12 ? 
O6 H61 0.9006 . ? 
O6 H62 0.8993 . ? 
 
loop_ 
 _geom_angle_atom_site_label_1 
 _geom_angle_atom_site_label_2 
 _geom_angle_atom_site_label_3 
 _geom_angle 
 _geom_angle_site_symmetry_1 
 _geom_angle_site_symmetry_3 
 _geom_angle_publ_flag 
N2 C1 C2 109.9(2) . . ? 
N2 C1 H1A 109.7 . . ? 
C2 C1 H1A 109.7 . . ? 
N2 C1 H1B 109.7 . . ? 
C2 C1 H1B 109.7 . . ? 
H1A C1 H1B 108.2 . . ? 
N1 C2 C1 110.2(2) . . ? 
N1 C2 H2A 109.6 . . ? 
C1 C2 H2A 109.6 . . ? 
N1 C2 H2B 109.6 . . ? 
C1 C2 H2B 109.6 . . ? 
H2A C2 H2B 108.1 . . ? 
N1 C3 C4 111.9(2) . . ? 
N1 C3 H3A 109.2 . . ? 
C4 C3 H3A 109.2 . . ? 
N1 C3 H3B 109.2 . . ? 
C4 C3 H3B 109.2 . . ? 
H3A C3 H3B 107.9 . . ? 
N2 C4 C3 109.4(2) . . ? 
N2 C4 C5 110.7(2) . . ? 
C3 C4 C5 111.0(2) . . ? 
N2 C4 H4 108.6 . . ? 
C3 C4 H4 108.6 . . ? 
C5 C4 H4 108.6 . . ? 
C4 C5 H5A 109.5 . . ? 
C4 C5 H5B 109.5 . . ? 
H5A C5 H5B 109.5 . . ? 
C4 C5 H5C 109.5 . . ? 
H5A C5 H5C 109.5 . . ? 
H5B C5 H5C 109.5 . . ? 
C3 N1 C2 111.20(19) . . ? 
C3 N1 H1C 109.4 . . ? 
C2 N1 H1C 109.4 . . ? 
C3 N1 H1D 109.4 . . ? 
C2 N1 H1D 109.4 . . ? 
H1C N1 H1D 108.0 . . ? 
C1 N2 C4 112.68(19) . . ? 
C1 N2 H2C 109.1 . . ? 
C4 N2 H2C 109.1 . . ? 
C1 N2 H2D 109.1 . . ? 
C4 N2 H2D 109.1 . . ? 
H2C N2 H2D 107.8 . . ? 
O3 P1 O2 112.43(10) . . y
O3 P1 O1 112.34(10) . . y 
O2 P1 O1 112.62(10) . . y 
O3 P1 H1 106.3 . . ? 
O2 P1 H1 106.3 . . ? 
O1 P1 H1 106.3 . . ? 
H41 O4 H42 98.5 . . ? 
H51 O5 H52 109.8 . . ? 
O6 O6 O6 114.22(18) 11 12 ? 
O6 O6 H61 120.5 11 . ? 
O6 O6 H61 107.6 12 . ? 
O6 O6 H62 90.1 11 . ? 
O6 O6 H62 32.8 12 . ? 
H61 O6 H62 105.0 . . ? 
 
loop_ 
 _geom_torsion_atom_site_label_1 
 _geom_torsion_atom_site_label_2 
 _geom_torsion_atom_site_label_3 
 _geom_torsion_atom_site_label_4 
 _geom_torsion 
 _geom_torsion_site_symmetry_1 
 _geom_torsion_site_symmetry_2 
 _geom_torsion_site_symmetry_3 
 _geom_torsion_site_symmetry_4 
 _geom_torsion_publ_flag 
N2 C1 C2 N1 -57.3(3) . . . . ? 
N1 C3 C4 N2 54.1(3) . . . . ? 
N1 C3 C4 C5 176.6(2) . . . . ? 
C4 C3 N1 C2 -56.8(3) . . . . ? 
C1 C2 N1 C3 57.8(3) . . . . ? 
C2 C1 N2 C4 57.0(3) . . . . ? 
C3 C4 N2 C1 -54.8(3) . . . . ? 
C5 C4 N2 C1 -177.5(2) . . . . ? 
 
loop_ 
 _geom_hbond_atom_site_label_D 
 _geom_hbond_atom_site_label_H 
 _geom_hbond_atom_site_label_A 
 _geom_hbond_distance_DH 
 _geom_hbond_distance_HA 
 _geom_hbond_distance_DA 
 _geom_hbond_angle_DHA 
 _geom_hbond_site_symmetry_A 

N1 H1C O3  0.90 1.75 2.648(3) 176 . 
N1 H1D O1  0.90 1.83 2.701(3) 164 1_556 
N2 H2C O1  0.90 1.80 2.680(3) 166 11_556 
N2 H2D O2  0.90 1.77 2.665(3) 173 11_557 
O4 H41 O3  0.93 1.82 2.746(3) 172 . 
O4 H42 O4  0.92 1.81 2.724(2) 171 5 
O5 H51 O2  0.98 1.89 2.830(3) 161 . 
O5 H52 O5  0.89 2.05 2.829(3) 147 12_556 
O6 H61 O5  0.90 2.01 2.912(7) 180 11 
O6 H62 O6  0.90 2.04 2.942(5) 180 2 
 
_diffrn_measured_fraction_theta_max    1.000 
_diffrn_reflns_theta_full              26.00 
_diffrn_measured_fraction_theta_full   1.000 
_refine_diff_density_max    0.244 
_refine_diff_density_min   -0.152 
_refine_diff_density_rms    0.044 
