# Supplementary material
Source: MDPI journal article supplement (https://www.mdpi.com/2073-4352/1/4/236)
Supplement: s2 [file s2]

 
data_wh426a 

# chiral 
 
_audit_creation_method            SHELXL-97 
_chemical_name_systematic 
; 
 ? 
; 
_chemical_name_common             ? 
_chemical_melting_point           ? 
_chemical_formula_moiety          'C5 H14 N2, H O3 P, H2 O' 
_chemical_formula_sum             'C5 H17 N2 O4 P' 
_chemical_formula_weight          200.18
_chemical_absolute_configuration  syn
 
loop_ 
 _atom_type_symbol 
 _atom_type_description 
 _atom_type_scat_dispersion_real 
 _atom_type_scat_dispersion_imag 
 _atom_type_scat_source 
 'C'  'C'   0.0033   0.0016 
 'International Tables Vol C Tables 4.2.6.8 and 6.1.1.4' 
 'H'  'H'   0.0000   0.0000 
 'International Tables Vol C Tables 4.2.6.8 and 6.1.1.4' 
 'N'  'N'   0.0061   0.0033 
 'International Tables Vol C Tables 4.2.6.8 and 6.1.1.4' 
 'O'  'O'   0.0106   0.0060 
 'International Tables Vol C Tables 4.2.6.8 and 6.1.1.4' 
 'P'  'P'   0.1023   0.0942 
 'International Tables Vol C Tables 4.2.6.8 and 6.1.1.4' 
 
_symmetry_cell_setting            orthorhombic 
_symmetry_space_group_name_H-M    'P 21 21 21'
_symmetry_space_group_name_Hall   'P 2ac 2ab'
 
loop_ 
 _symmetry_equiv_pos_as_xyz 
 'x, y, z' 
 '-x+1/2, -y, z+1/2' 
 '-x, y+1/2, -z+1/2' 
 'x+1/2, -y+1/2, -z' 
 
_cell_length_a                    8.564(5) 
_cell_length_b                    9.593(6) 
_cell_length_c                    11.607(6) 
_cell_angle_alpha                 90.00 
_cell_angle_beta                  90.00 
_cell_angle_gamma                 90.00 
_cell_volume                      953.6(9) 
_cell_formula_units_Z             4 
_cell_measurement_temperature     293(2) 
_cell_measurement_reflns_used     237
_cell_measurement_theta_min       2.96 
_cell_measurement_theta_max       16.21
 
_exptl_crystal_description        rod 
_exptl_crystal_colour             colourless 
_exptl_crystal_size_max           0.04 
_exptl_crystal_size_mid           0.01 
_exptl_crystal_size_min           0.01 
_exptl_crystal_density_meas       ? 
_exptl_crystal_density_diffrn     1.394 
_exptl_crystal_density_method     'not measured' 
_exptl_crystal_F_000              432 
_exptl_absorpt_coefficient_mu     0.272 
_exptl_absorpt_correction_type    none 
_exptl_absorpt_correction_T_min   ? 
_exptl_absorpt_correction_T_max   ? 
_exptl_absorpt_process_details    ? 
 
_exptl_special_details 
; 
 ? 
; 
 
_diffrn_ambient_temperature       293(2) 
_diffrn_radiation_wavelength      0.71073 
_diffrn_radiation_type            MoK\a 
_diffrn_radiation_source          'fine-focus sealed tube' 
_diffrn_radiation_monochromator   graphite 
_diffrn_measurement_device_type   'Bruker SMART1000 CCD' 
_diffrn_measurement_method        \w 
_diffrn_detector_area_resol_mean  ? 
_diffrn_standards_number          ? 
_diffrn_standards_interval_count  ? 
_diffrn_standards_interval_time   ? 
_diffrn_standards_decay_%         0 
_diffrn_reflns_number             5970 
_diffrn_reflns_av_R_equivalents   0.2468 
_diffrn_reflns_av_sigmaI/netI     0.2079 
_diffrn_reflns_limit_h_min        -10 
_diffrn_reflns_limit_h_max        10 
_diffrn_reflns_limit_k_min        -11 
_diffrn_reflns_limit_k_max        11 
_diffrn_reflns_limit_l_min        -8 
_diffrn_reflns_limit_l_max        14 
_diffrn_reflns_theta_min          2.75 
_diffrn_reflns_theta_max          26.00 
_reflns_number_total              1104 
_reflns_number_gt                 507 
_reflns_threshold_expression      I>2\s(I) 
 
_computing_data_collection        'SMART (Bruker, 1999)'
_computing_cell_refinement        'SAINT (Bruker, 1999)'
_computing_data_reduction         'SAINT'
_computing_structure_solution     'SHELXS-97 (Sheldrick, 2008)' 
_computing_structure_refinement   'SHELXL-97 (Sheldrick, 2008)' 
_computing_molecular_graphics     'ORTEP-3 (Farrugia, 1997)'
_computing_publication_material   'SHELXL-97'
 
_refine_special_details 
; 
 Refinement of F^2^ against ALL reflections.  The weighted R-factor wR and 
 goodness of fit S are based on F^2^, conventional R-factors R are based 
 on F, with F set to zero for negative F^2^. The threshold expression of 
 F^2^ > 2sigma(F^2^) is used only for calculating R-factors(gt) etc. and is 
 not relevant to the choice of reflections for refinement.  R-factors based 
 on F^2^ are statistically about twice as large as those based on F, and R- 
 factors based on ALL data will be even larger. 
; 
 
_refine_ls_structure_factor_coef  Fsqd  
_refine_ls_matrix_type            full 
_refine_ls_weighting_scheme       calc  
_refine_ls_weighting_details 
 'calc w=1/[\s^2^(Fo^2^)+(0.0035P)^2^] where P=(Fo^2^+2Fc^2^)/3' 
_atom_sites_solution_primary      direct 
_atom_sites_solution_secondary    difmap 
_atom_sites_solution_hydrogens    'difmap and geom' 
_refine_ls_hydrogen_treatment     constr 
_refine_ls_extinction_method      none 
_refine_ls_extinction_coef        ? 
_refine_ls_abs_structure_details  none
_refine_ls_number_reflns          1104 
_refine_ls_number_parameters      110 
_refine_ls_number_restraints      0 
_refine_ls_R_factor_all           0.1598 
_refine_ls_R_factor_gt            0.0657 
_refine_ls_wR_factor_ref          0.0811 
_refine_ls_wR_factor_gt           0.0650 
_refine_ls_goodness_of_fit_ref    0.785 
_refine_ls_restrained_S_all       0.785 
_refine_ls_shift/su_max           0.000 
_refine_ls_shift/su_mean          0.000 
 
loop_ 
 _atom_site_label 
 _atom_site_type_symbol 
 _atom_site_fract_x 
 _atom_site_fract_y 
 _atom_site_fract_z 
 _atom_site_U_iso_or_equiv 
 _atom_site_adp_type 
 _atom_site_occupancy 
 _atom_site_symmetry_multiplicity 
 _atom_site_calc_flag 
 _atom_site_refinement_flags 
 _atom_site_disorder_assembly 
 _atom_site_disorder_group 
P1 P 0.0585(2) 0.03315(18) 0.52184(16) 0.0352(5) Uani 1 1 d . . . 
H1 H 0.0009 0.0933 0.6149 0.042 Uiso 1 1 calc R . . 
O1 O -0.0485(5) -0.0860(4) 0.4928(5) 0.0650(16) Uani 1 1 d . . . 
O2 O 0.2183(4) -0.0227(4) 0.5542(4) 0.0522(14) Uani 1 1 d . . . 
O3 O 0.0643(6) 0.1426(4) 0.4300(4) 0.0575(15) Uani 1 1 d . . . 
N1 N 0.1605(5) 0.6686(5) 0.4979(5) 0.0358(16) Uani 1 1 d . . . 
H1A H 0.2603 0.6391 0.5003 0.043 Uiso 1 1 calc R . . 
H1B H 0.1604 0.7607 0.5126 0.043 Uiso 1 1 calc R . . 
N2 N 0.0078(5) 0.4146(5) 0.4489(5) 0.0420(18) Uani 1 1 d . . . 
H2A H -0.0926 0.4422 0.4481 0.050 Uiso 1 1 calc R . . 
H2B H 0.0099 0.3223 0.4350 0.050 Uiso 1 1 calc R . . 
C1 C 0.0707(9) 0.5963(6) 0.5893(6) 0.044(2) Uani 1 1 d . . . 
H1C H -0.0364 0.6292 0.5900 0.053 Uiso 1 1 calc R . . 
H1D H 0.1167 0.6147 0.6641 0.053 Uiso 1 1 calc R . . 
C2 C 0.0752(8) 0.4423(7) 0.5637(5) 0.042(2) Uani 1 1 d . . . 
H2C H 0.1824 0.4096 0.5660 0.050 Uiso 1 1 calc R . . 
H2D H 0.0164 0.3921 0.6219 0.050 Uiso 1 1 calc R . . 
C3 C 0.0946(8) 0.4884(6) 0.3562(6) 0.0378(19) Uani 1 1 d . . . 
H3A H 0.0450 0.4706 0.2826 0.045 Uiso 1 1 calc R . . 
H3B H 0.2007 0.4533 0.3526 0.045 Uiso 1 1 calc R . . 
C4 C 0.0973(8) 0.6448(7) 0.3794(6) 0.0316(18) Uani 1 1 d . . . 
H4 H -0.0099 0.6804 0.3762 0.038 Uiso 1 1 calc R . . 
C5 C 0.1952(8) 0.7228(8) 0.2921(7) 0.055(2) Uani 1 1 d . . . 
H5A H 0.1885 0.8211 0.3068 0.082 Uiso 1 1 calc R . . 
H5B H 0.1573 0.7035 0.2160 0.082 Uiso 1 1 calc R . . 
H5C H 0.3020 0.6933 0.2982 0.082 Uiso 1 1 calc R . . 
O4 O 0.2874(6) 0.1764(6) 0.2631(4) 0.0723(18) Uani 1 1 d . . . 
H2 H 0.2128 0.1655 0.3094 0.087 Uiso 1 1 d R . . 
H3 H 0.2863 0.1255 0.1946 0.087 Uiso 1 1 d R . . 
 
loop_ 
 _atom_site_aniso_label 
 _atom_site_aniso_U_11 
 _atom_site_aniso_U_22 
 _atom_site_aniso_U_33 
 _atom_site_aniso_U_23 
 _atom_site_aniso_U_13 
 _atom_site_aniso_U_12 
P1 0.0302(8) 0.0305(9) 0.0448(12) 0.0005(11) 0.0046(11) 0.0053(10) 
O1 0.035(2) 0.040(2) 0.119(5) -0.023(3) 0.004(4) -0.008(3) 
O2 0.031(2) 0.065(3) 0.061(4) 0.022(3) -0.004(2) 0.002(3) 
O3 0.080(3) 0.033(3) 0.060(4) 0.009(3) 0.017(3) 0.019(3) 
N1 0.038(3) 0.024(3) 0.045(5) 0.001(4) -0.006(3) 0.003(2) 
N2 0.030(3) 0.025(3) 0.071(5) -0.001(3) -0.011(3) 0.001(3) 
C1 0.049(5) 0.045(5) 0.037(5) -0.003(4) 0.008(5) -0.005(5) 
C2 0.029(4) 0.061(6) 0.034(5) 0.016(4) 0.002(4) -0.008(4) 
C3 0.034(4) 0.037(5) 0.043(5) -0.002(4) -0.001(3) -0.004(4) 
C4 0.026(4) 0.030(4) 0.039(5) -0.004(4) -0.008(4) 0.003(4) 
C5 0.058(5) 0.058(6) 0.049(6) 0.011(5) -0.011(5) -0.001(5) 
O4 0.072(4) 0.084(4) 0.061(5) -0.006(3) 0.005(3) -0.017(4) 
 
_geom_special_details 
; 
 All esds (except the esd in the dihedral angle between two l.s. planes) 
 are estimated using the full covariance matrix.  The cell esds are taken 
 into account individually in the estimation of esds in distances, angles 
 and torsion angles; correlations between esds in cell parameters are only 
 used when they are defined by crystal symmetry.  An approximate (isotropic) 
 treatment of cell esds is used for estimating esds involving l.s. planes. 
; 
 
loop_ 
 _geom_bond_atom_site_label_1 
 _geom_bond_atom_site_label_2 
 _geom_bond_distance 
 _geom_bond_site_symmetry_2 
 _geom_bond_publ_flag 
P1 O3 1.497(4) . y 
P1 O1 1.504(4) . y 
P1 O2 1.517(4) . y 
P1 H1 1.3200 . ? 
N1 C1 1.482(7) . ? 
N1 C4 1.496(8) . ? 
N1 H1A 0.9000 . ? 
N1 H1B 0.9000 . ? 
N2 C2 1.477(7) . ? 
N2 C3 1.487(7) . ? 
N2 H2A 0.9000 . ? 
N2 H2B 0.9000 . ? 
C1 C2 1.508(7) . ? 
C1 H1C 0.9700 . ? 
C1 H1D 0.9700 . ? 
C2 H2C 0.9700 . ? 
C2 H2D 0.9700 . ? 
C3 C4 1.525(8) . ? 
C3 H3A 0.9700 . ? 
C3 H3B 0.9700 . ? 
C4 C5 1.513(9) . ? 
C4 H4 0.9800 . ? 
C5 H5A 0.9600 . ? 
C5 H5B 0.9600 . ? 
C5 H5C 0.9600 . ? 
O4 H2 0.8412 . ? 
O4 H3 0.9329 . ? 
 
loop_ 
 _geom_angle_atom_site_label_1 
 _geom_angle_atom_site_label_2 
 _geom_angle_atom_site_label_3 
 _geom_angle 
 _geom_angle_site_symmetry_1 
 _geom_angle_site_symmetry_3 
 _geom_angle_publ_flag 
O3 P1 O1 113.2(3) . . y 
O3 P1 O2 113.2(3) . . y 
O1 P1 O2 109.7(2) . . y 
O3 P1 H1 106.8 . . ? 
O1 P1 H1 106.8 . . ? 
O2 P1 H1 106.8 . . ? 
C1 N1 C4 113.5(5) . . ? 
C1 N1 H1A 108.9 . . ? 
C4 N1 H1A 108.9 . . ? 
C1 N1 H1B 108.9 . . ? 
C4 N1 H1B 108.9 . . ? 
H1A N1 H1B 107.7 . . ? 
C2 N2 C3 111.8(4) . . ? 
C2 N2 H2A 109.3 . . ? 
C3 N2 H2A 109.3 . . ? 
C2 N2 H2B 109.3 . . ? 
C3 N2 H2B 109.3 . . ? 
H2A N2 H2B 107.9 . . ? 
N1 C1 C2 107.7(6) . . ? 
N1 C1 H1C 110.2 . . ? 
C2 C1 H1C 110.2 . . ? 
N1 C1 H1D 110.2 . . ? 
C2 C1 H1D 110.2 . . ? 
H1C C1 H1D 108.5 . . ? 
N2 C2 C1 110.1(6) . . ? 
N2 C2 H2C 109.6 . . ? 
C1 C2 H2C 109.6 . . ? 
N2 C2 H2D 109.6 . . ? 
C1 C2 H2D 109.6 . . ? 
H2C C2 H2D 108.2 . . ? 
N2 C3 C4 110.4(5) . . ? 
N2 C3 H3A 109.6 . . ? 
C4 C3 H3A 109.6 . . ? 
N2 C3 H3B 109.6 . . ? 
C4 C3 H3B 109.6 . . ? 
H3A C3 H3B 108.1 . . ? 
N1 C4 C5 109.8(5) . . ? 
N1 C4 C3 108.5(5) . . ? 
C5 C4 C3 112.1(6) . . ? 
N1 C4 H4 108.8 . . ? 
C5 C4 H4 108.8 . . ? 
C3 C4 H4 108.8 . . ? 
C4 C5 H5A 109.5 . . ? 
C4 C5 H5B 109.5 . . ? 
H5A C5 H5B 109.5 . . ? 
C4 C5 H5C 109.5 . . ? 
H5A C5 H5C 109.5 . . ? 
H5B C5 H5C 109.5 . . ? 
H2 O4 H3 118.2 . . ? 
 
loop_ 
 _geom_torsion_atom_site_label_1 
 _geom_torsion_atom_site_label_2 
 _geom_torsion_atom_site_label_3 
 _geom_torsion_atom_site_label_4 
 _geom_torsion 
 _geom_torsion_site_symmetry_1 
 _geom_torsion_site_symmetry_2 
 _geom_torsion_site_symmetry_3 
 _geom_torsion_site_symmetry_4 
 _geom_torsion_publ_flag 
C4 N1 C1 C2 59.6(7) . . . . ? 
C3 N2 C2 C1 59.7(7) . . . . ? 
N1 C1 C2 N2 -58.8(8) . . . . ? 
C2 N2 C3 C4 -57.2(6) . . . . ? 
C1 N1 C4 C5 179.7(6) . . . . ? 
C1 N1 C4 C3 -57.4(7) . . . . ? 
N2 C3 C4 N1 54.0(7) . . . . ? 
N2 C3 C4 C5 175.5(5) . . . . ? 
 
loop_ 
 _geom_hbond_atom_site_label_D 
 _geom_hbond_atom_site_label_H 
 _geom_hbond_atom_site_label_A 
 _geom_hbond_distance_DH 
 _geom_hbond_distance_HA 
 _geom_hbond_distance_DA 
 _geom_hbond_angle_DHA 
 _geom_hbond_site_symmetry_A 
N1 H1A O1  0.90 1.72 2.617(6) 179 4_556 
N1 H1B O2  0.90 2.19 3.073(6) 167 1_565 
N1 H1B O1  0.90 2.33 2.958(6) 127 1_565 
N2 H2B O3  0.90 1.79 2.662(6) 164 . 
N2 H2A O2  0.90 1.79 2.688(6) 172 4_456 
O4 H2 O3   0.84 1.91 2.741(7) 172 . 
O4 H3 O2   0.93 1.91 2.838(7) 179 2_554 
 
_diffrn_measured_fraction_theta_max    0.998 
_diffrn_reflns_theta_full              26.00 
_diffrn_measured_fraction_theta_full   0.998 
_refine_diff_density_max    0.222 
_refine_diff_density_min   -0.212 
_refine_diff_density_rms    0.055 
